# Supplementary material for: Water uptake of subpollen aerosol particles: hygroscopic growth, CCN activation, and liquid-liquid phase separation
Source: Copernicus journal article supplement (doi:10.5194/acp-2020-1224), 2020-12-01
Supplement: Supplementary file [file acp-2020-1224-AC3-supplement.pdf]

## Response to referee #2

The referee's comments are in italics, our responses in plain font.

*Eugene et al presented a set of comprehensive hygroscopicity measurement of subpollen particles. The paper is well written, and the experimental results are robust. The author measure hygroscopicity ranged from 2 to 1.2%, and the liquid-liquid phase separation model was used to explain the solution non-ideal behaviour. The literature review in the introduction is well written and informative. This is an interesting study and should be published in ACP with minor revisions.*

We thank referee #2 for the constructive criticism and suggestions for improvement that were taken into account upon manuscript revision. Responses to individual comments are given below.

1. *The paper is long and hard to follow, there are few parts not necessarily to be in the main text, e.g. section 3.1, 3.2 and 3.4.*

These sections are essential parts of the paper. They contain results that are used to interpret the CCN and HHTDMA measurements. In my opinion, it is inconvenient to repeatedly refer to the Appendix or Supplement to find the desired information. Alternatively, Sections 2.6 and 2.8 were substantially shorten. Some equations and accompanying material we sent to the Supplement.

2. *Page 2 line 33: The reference of kappa is missing.*

The reference to Petters and Kreidenweis, 2007 is added.

3. *Figure 1 and 2 can go to supporting information.*  
Done.

4. *page 14 section 3.1. is there any size-resolved chemical analysis? I assume figure 3 presented the bulk chemical compositions.*

Yes, it is. We clarified this point: “**Bulk** chemical analysis results of water-extractable compounds are summarized in Table 1 and illustrated in Fig. 1.”

5. *Page 16. It is not clear why the hydrodynamics size distribution and the aging experiments were performed? What is the implication of this experiment?*

As shown in Sect.3.1 and underlined in Sect.3.2, the dry aerosol is an external mixture of water-soluble and water-insoluble compounds. The effect of the water-insoluble compounds (hydrosols) on particle hygroscopicity depends on its size range. DLS measurements (Sect.3.2) show that the size of colloidal particles spans the range of 40-110 nm i.e. within the SPP size range of dry particles (20-190 nm) used for CCN and HHTDMA measurements. This information was further used to characterize size-dependent CCN properties of SPP (Sect.3.5).

As noted in Sect.3.2, the aging of nebulized solution caused by hydrosols coagulation can change the size-selected dry particle composition during the HHTDMA (8 h) and CCN (4 h) experiments. DLS and turbidity test measurements showed that this effect is insignificant in the specified time periods, while it becomes noticeable after 10 h of aging (Suppl. S6).

6. *Page 21 Figure 7. What is the difference between a1 a2 a3 a4? I assume it is the different pictures of the same sample.*

You are right. To avoid confusions we have only saved one image for each sample.

7. *Figure 7. The description of SEM can go to the Method section.*

Done.

8. Page 25 line 3: 0.16 not 16.

Corrected.

9. Page 25 line 4: Any calculation of kappa based on chemical composition?

To calculate  $\kappa_{chem}$  at least concentrations of organic molecules and neutral salts have to be known. Our chemical analysis is not full. For example, we know total concentrations of water-soluble carbohydrates and proteins but not their molecular composition. Neutral salts concentrations are also needed for kappa calculation. Unfortunately, ion balance of anions and cations does not converge. The most likely cause is the ability of charged proteins to bind cations and anions selectively (salting in effect). For the above reasons, we did not compute  $\kappa_{chem}$ .

10. Page 26 Figure 11: can you added the shaded area in the left column of GF-RH curves using kappa model, with the lowest and highest kappa in the right column.

The  $\kappa$ -Köhler curves with min. and max. kappa values are shown as inset in Fig.9 (left panels). The following accompanying text was added:

“Insert in panels (a), (c), (e) of Fig. 9 (old Fig.11) shows the  $\kappa$ -Köhler modeling results (Eq.6) with minimum and maximum  $\kappa_b$  values observed on the  $\kappa_b(a_w)$  dependences (panels (b), (d), (f) of Fig.9). The difference in the Köhler curves reflects potential uncertainty arising from spinodal decomposition. The lower Köhler curve fits the particle growth factors before onset SRH (orange line), while upper Köhler curve corresponds to maximum  $\kappa_b$  observed after LLPS. Intermediate data points indicate gradual phase separation accompanied by the particle engulfed morphology (Fig.10)”.

11. Figure 13. Is the difference between Birch SPP, Pine SPP and Rapeseed SPP statistical significant?

As outlined in Sect. 3.5 and shown in Fig.10 (now Fig. 8), the difference between Birch SPP, Pine SPP, and Rapeseed SPP in the  $\kappa_{CCN}$  values averaged throughout the 35-170 nm size range is not statistically significant. However, noticeable size-dependent variations in SPP hygroscopicity are traced. Aerosol particles in size range of 80-120 nm are more hygroscopic ( $\kappa_a \sim 0.20$ ) than these in the range from 35 to 70 nm ( $\kappa_a \sim 0.14$ ) and above 130 nm ( $\kappa_a \sim 0.13$ ). The observed variations in  $\kappa_a$  are due to the size-dependent ratio of water-soluble and water-insoluble material in the dry particles. We slightly polished the text in Sect.3.5 to specify the difference between mean and size-dependent kappa.

12. Figure 14. Is the liquid-liquid phase separation model used to reproduce the observations? If yes, is it comparable?

Not at the moment, but I am pondering this question. In the case of AIOMFAC or E-AIM model, the quantity of subgroups has to be known. It is a problem since molecular composition of SPP is not known. We assume that proteins with C/O  $\sim 0.4$  trigger LLPS, but their thermodynamic properties are poorly defined within existing models. Particularly, peptide bond (CHON) is not present in the subgroup list. Besides, effects of intramolecular interactions between functional groups are usually not considered in AIOMFAC and E-AIM models. Recent results by Luo et al. (Sci. Total Environ., 734 (2020) 139318) showed that even for single amino acids, the measured growth factors were much lower than those predicted by the E-AIM using standard UNIFAC model. We plan to model LLPS using the Flory-Huggins model, which is more suitable for mixed solutions containing water-soluble polymers.

13. Page 34 line 24 it is hard to know Hods et al. (2016) belongs to which sentence.

Corrected

*14. Page 35 line 1. To me this paragraph is not really related to the main topic of this paper.*

This paragraph has been removed.

*15. Page 35 line 21, is sea-spray aerosol a kind of natural aerosol?*

Text corrected.

I would like to thank the reviewer#2 again for helpful and constructive comments.
